# Supplementary material
Source: publisher figshare collection journal article supplement (https://springernature.figshare.com/ndownloader/files/18091673)

Additional file 2


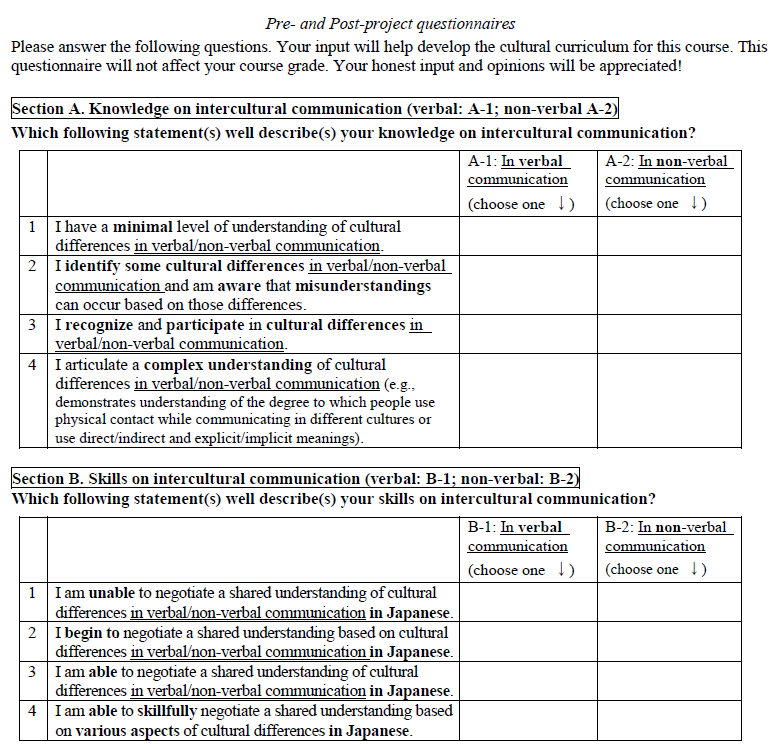


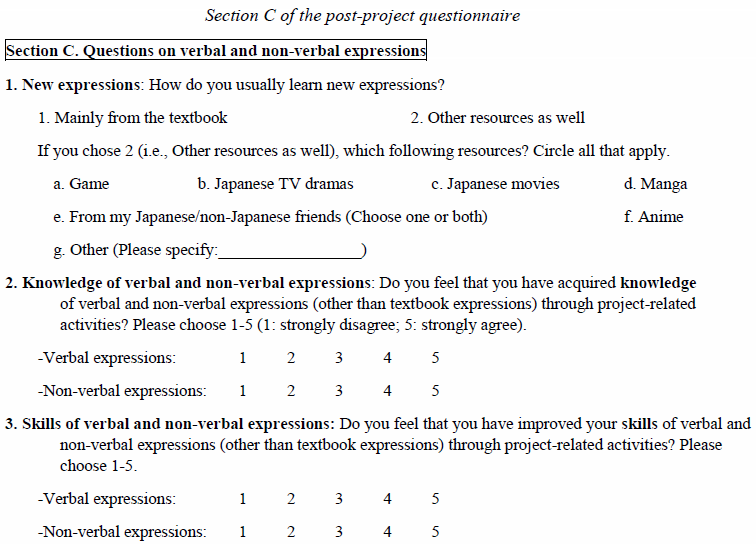


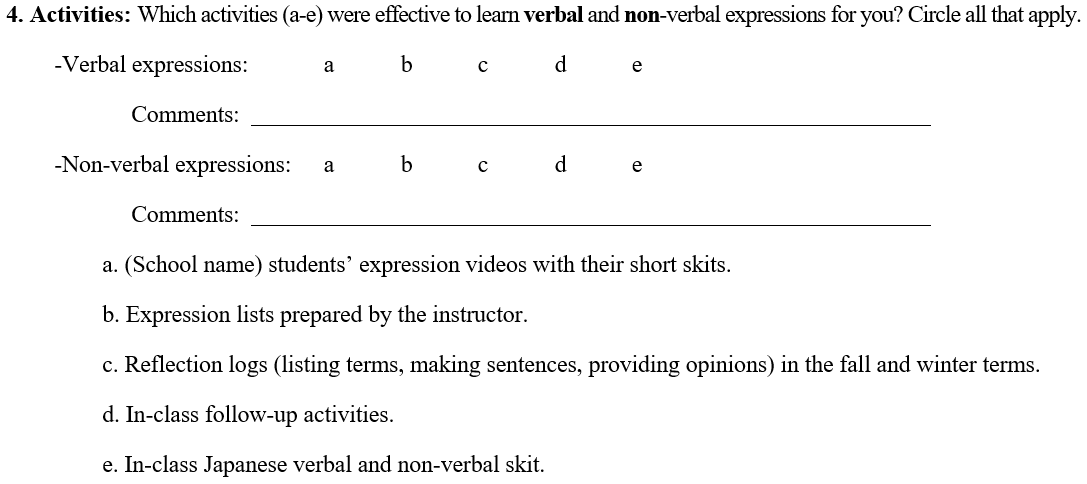

Supplement: Supplementary file 1 [file 18091673]
